# Supplementary material
Source: publisher site journal article supplement (https://www.spandidos-publications.com/4829/downloadSupplementary)
Supplement: Supplementary file 1 [file downloadSupplementary]

**Table SI.** Clinical characteristics of patients with pancreatic adenocarcinoma (n=178) from The Cancer Genome Atlas.

| Clinical characteristics | No. (%)  |
|--------------------------|----------|
| Age at diagnosis, years  |          |
| <65                      | 90 (51)  |
| ≥65                      | 88 (49)  |
| Sex                      |          |
| Female                   | 82 (46)  |
| Male                     | 96 (54)  |
| State                    |          |
| Live                     | 79 (44)  |
| Death                    | 99 (56)  |
| Grade                    |          |
| G1                       | 29 (16)  |
| G2                       | 93 (52)  |
| G3                       | 47 (26)  |
| G4                       | 3 (2)    |
| Gx                       | 6 (3)    |
| Clinical stage           |          |
| Stage I                  | 19 (11)  |
| Stage II                 | 142 (80) |
| Stage III                | 4 (2)    |
| Stage IV                 | 5 (3)    |
| Unknown                  | 8 (4)    |
| T stage                  |          |
| T1                       | 7 (4)    |
| T2                       | 21 (12)  |
| T3                       | 139 (78) |
| T4                       | 4 (2)    |
| Tx                       | 7 (4)    |
| Distant metastasis       |          |
| Negative                 | 79 (44)  |
| Positive                 | 5 (3)    |
| Mx                       | 94 (53)  |
| Lymph nodes              |          |
| Negative                 | 48 (27)  |
| Positive                 | 120 (67) |
| Nx                       | 10 (6)   |
